# Supplementary material
Source: publisher figshare collection journal article supplement (https://tandf.figshare.com/articles/dataset/_/17031907)
Supplement: Supplementary file 1 [file 1]

# The Chelsea Critical Care Physical Assessment tool – Dansk version (CPAx-D)

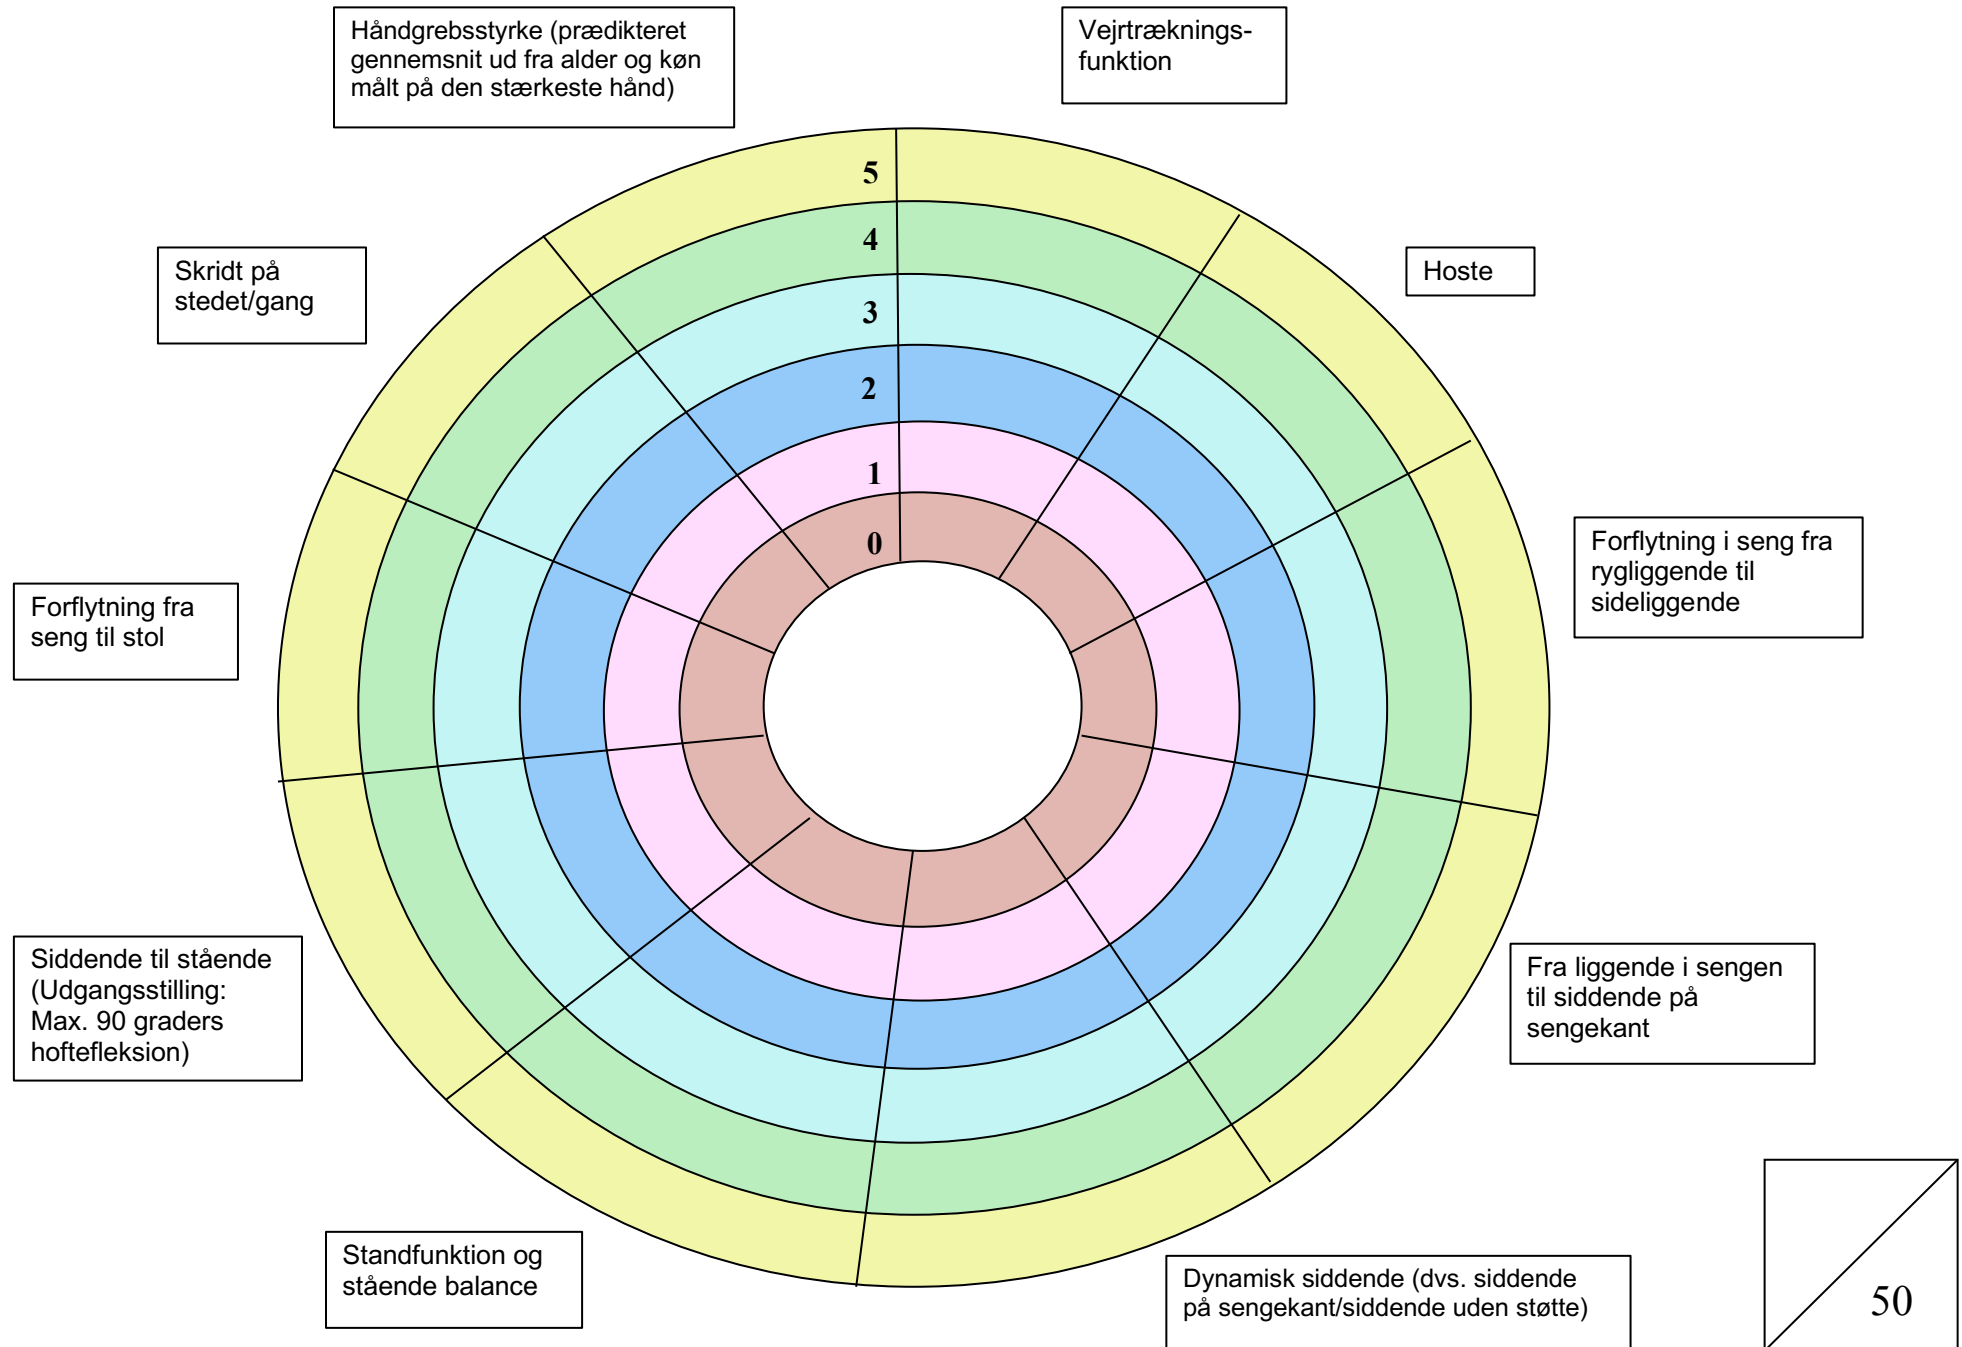

## The Chelsea Critical Care Physical Assessment tool – Dansk version (CPAx-D)

| Fysisk funktionsevne                                                | Niveau 0                                                                                          | Niveau 1                                                                                   | Niveau 2                                                                                                          | Niveau 3                                                                                                                                | Niveau 4                                                                                                       | Niveau 5                                                                                    |
|---------------------------------------------------------------------|---------------------------------------------------------------------------------------------------|--------------------------------------------------------------------------------------------|-------------------------------------------------------------------------------------------------------------------|-----------------------------------------------------------------------------------------------------------------------------------------|----------------------------------------------------------------------------------------------------------------|---------------------------------------------------------------------------------------------|
| Vejtrækningsfunktion                                                | Afhængig af respirator. Vejtrækning er fuldstændig styret af respirator. Kan være sederet/lammet. | Afhængig af respirator. Vejtrækning er styret af respirator med nogen spontan vejtrækning. | Spontan vejtrækning med <b>kontinuerlig</b> invasiv eller non-invasiv respiratorisk støtte.                       | Spontan vejtrækning med <b>intermitterende</b> invasiv eller non-invasiv respiratorisk støtte ELLER kontinuerlig High flow (>15 liter). | Spontan vejtrækning med ilttilførsel.                                                                          | Spontan vejtrækning uden ilttilførsel.                                                      |
| Hoste                                                               | Ingen hosterefleks. Kan være sederet/lammet.                                                      | Hoste stimuleres ved dyb sugning ELLER reflektorisk.                                       | Svag, ineffektiv, viljestyret hoste. Ude af stand til selvstændigt at rense luftvejene f.eks. kræves dyb sugning. | Svag, delvis effektiv viljestyret hoste, nogle gange i stand til at rense luftvejene f.eks. sugning i mund og øvre svælg.               | Effektiv hoste. Renser luftvejene med sekretløsende teknikker.                                                 | Vedvarende effektiv viljestyret hoste. Frigør sekret selvstændigt.                          |
| Forflytning i seng fra rygliggende til sideliggende                 | Kan ikke initiere bevægelse ELLER ustabil. Kan være sederet/lammet.                               | Initierer bevægelse. Kræver <b>maksimal</b> assistance fra f.eks. 2 eller flere personer.  | Initierer bevægelse. Kræver <b>moderat</b> assistance fra f.eks. 1-2 personer.                                    | Initierer bevægelse. Kræver <b>minimal</b> assistance fra 1 person.                                                                     | Uafhængig på $\geq 3$ sekunder.                                                                                | Uafhængig på $< 3$ sekunder.                                                                |
| Fra liggende i sengen til siddende på sengekant                     | Kan ikke/ustabil.                                                                                 | Initierer bevægelse. Kræver <b>maksimal</b> assistance fra f.eks. 2 eller flere personer.  | Initierer bevægelse. Kræver <b>moderat</b> assistance fra f.eks. 1-2 personer.                                    | Initierer bevægelse. Kræver <b>minimal</b> assistance fra 1 person.                                                                     | Uafhængig på $\geq 3$ sekunder.                                                                                | Uafhængig på $< 3$ sekunder.                                                                |
| Dynamisk siddende (dvs. siddende på sengekant/siddende uden støtte) | Kan ikke/ustabil.                                                                                 | Kræver <b>maksimal</b> assistance fra f.eks. 2 eller flere personer.                       | Kræver <b>moderat</b> assistance fra f.eks. 1-2 personer.                                                         | Kan sidde med <b>minimal</b> støtte eller skyggestøtte.                                                                                 | Uafhængig med nogen dynamisk siddende balance, dvs. kan ændre truncus-position indenfor understøttelsesfladen. | Uafhængig med fuld dynamisk siddende balance, dvs. kan række ud over understøttelsesfladen. |

## The Chelsea Critical Care Physical Assessment tool – Dansk version (CPAx-D)

| Fysisk funktionsevne                                                                   | Niveau 0           | Niveau 1                                                                               | Niveau 2                                                                                                  | Niveau 3                                                                                             | Niveau 4                                                                       | Niveau 5                                                                                                      |
|----------------------------------------------------------------------------------------|--------------------|----------------------------------------------------------------------------------------|-----------------------------------------------------------------------------------------------------------|------------------------------------------------------------------------------------------------------|--------------------------------------------------------------------------------|---------------------------------------------------------------------------------------------------------------|
| Standfunktion og stående balance                                                       | Kan ikke/ustabil.  | Vippeleje eller lignende.                                                              | Stålift eller lignende med assistance af $\geq 2$ personer.                                               | Afhængig af ganghjælpemiddel og/eller personstøtte.                                                  | Uafhængig uden brug af hjælpemidler eller personstøtte.                        | Uafhængig af hjælpemidler og med fuld dynamisk stående balance, dvs. kan række ud over understøttelsesfladen. |
| Siddende til stående (Udgangsstilling: Max. 90 graders hoftefleksion)                  | Kan ikke/ustabil.  | Fra siddende til stående med <b>maksimal</b> assistance f.eks. stålift eller lignende. | Fra siddende til stående med ganghjælpemiddel og/eller <b>moderat</b> assistance fra f.eks. 1-2 personer. | Fra siddende til stående med ganghjælpemiddel eller <b>minimal</b> assistance fra f.eks. 1 person.   | Uafhængigt fra siddende til stående med brug af arme.                          | Uafhængigt fra siddende til stående uden brug af arme.                                                        |
| Forflytning fra seng til stol                                                          | Kan ikke/ustabil.  | Fuld anvendelse af lift.                                                               | Stålift eller lignende.                                                                                   | Forflytning med vægtbæring på benene <b>uden</b> skridt med hjælpemiddel og/eller fysisk assistance. | Forflytning <b>med</b> skridt, og med hjælpemiddel og/eller fysisk assistance. | Selvstændig forflytning (uden hjælpemiddel eller personstøtte).                                               |
| Skridt på stedet/gang                                                                  | Kan ikke/ustabil.  | Med anvendelse af stålift eller lignende.                                              | Med anvendelse af hjælpemidler OG <b>moderat</b> assistance af $>1$ person.                               | Med anvendelse af hjælpemidler OG <b>minimal</b> assistance af 1 person.                             | Med anvendelse af hjælpemidler ELLER assistance af 1 person.                   | Selvstændig gangfunktion (uden hjælpemiddel eller personstøtte).                                              |
| Håndgrebsstyrke (prædikeret gennemsnit ud fra alder og køn målt på den stærkeste hånd) | Kan ikke vurderes. | $< 20\%$                                                                               | $< 40\%$                                                                                                  | $< 60\%$                                                                                             | $< 80\%$                                                                       | $\geq 80\%$                                                                                                   |

## The Chelsea Critical Care Physical Assessment tool – Dansk version (CPAx-D)

| Alder | Mænd |       |       |       |       |       |       | Kvinder |       |      |       |       |       |       |
|-------|------|-------|-------|-------|-------|-------|-------|---------|-------|------|-------|-------|-------|-------|
|       | Hånd | Mean  | <20%  | <40%  | <60%  | <80%  | ≥80%  | Hånd    | Mean  | <20% | <40%  | <60%  | <80%  | ≥80%  |
| 15-19 | Hø   | 46.91 | 9.38  | 18.76 | 28.15 | 37.53 | 37.53 | Hø      | 28.82 | 5.76 | 11.53 | 17.29 | 23.06 | 23.06 |
|       | Ve   | 42.13 | 8.43  | 16.85 | 25.28 | 33.70 | 33.70 | Ve      | 24.98 | 5.00 | 9.99  | 14.99 | 19.98 | 19.98 |
| 20-24 | Hø   | 48.15 | 9.63  | 19.26 | 28.89 | 38.52 | 38.52 | Hø      | 28.33 | 5.67 | 11.33 | 17.00 | 22.66 | 22.66 |
|       | Ve   | 43.08 | 8.62  | 17.23 | 25.85 | 34.46 | 34.46 | Ve      | 25.78 | 5.16 | 10.31 | 15.47 | 20.62 | 20.62 |
| 25-29 | Hø   | 53.76 | 10.75 | 21.50 | 32.26 | 43.01 | 43.01 | Hø      | 33.82 | 6.76 | 13.53 | 20.29 | 27.06 | 27.06 |
|       | Ve   | 48.60 | 9.72  | 19.44 | 29.16 | 38.88 | 38.88 | Ve      | 30.31 | 6.06 | 12.12 | 18.19 | 24.25 | 24.25 |
| 30-34 | Hø   | 52.63 | 10.53 | 21.05 | 31.58 | 42.10 | 42.10 | Hø      | 33.97 | 6.79 | 13.59 | 20.38 | 27.18 | 27.18 |
|       | Ve   | 48.98 | 9.80  | 19.59 | 29.39 | 39.18 | 39.18 | Ve      | 31.64 | 6.33 | 12.66 | 18.98 | 25.31 | 25.31 |
| 35-39 | Hø   | 53.16 | 10.63 | 21.26 | 31.90 | 42.53 | 42.53 | Hø      | 32.46 | 6.49 | 12.98 | 19.48 | 25.97 | 25.97 |
|       | Ve   | 51.75 | 10.35 | 20.70 | 31.05 | 41.40 | 41.40 | Ve      | 29.77 | 5.95 | 11.91 | 17.86 | 23.82 | 23.82 |
| 40-44 | Hø   | 55.49 | 11.10 | 22.20 | 33.29 | 44.39 | 44.39 | Hø      | 30.34 | 6.07 | 12.14 | 18.20 | 24.27 | 24.27 |
|       | Ve   | 50.40 | 10.08 | 20.16 | 30.24 | 40.32 | 40.32 | Ve      | 26.23 | 5.25 | 10.49 | 15.74 | 20.98 | 20.98 |
| 45-49 | Hø   | 49.93 | 9.99  | 19.97 | 29.96 | 39.94 | 39.94 | Hø      | 35.30 | 7.06 | 14.12 | 21.18 | 28.24 | 28.24 |
|       | Ve   | 48.94 | 9.79  | 19.58 | 29.36 | 39.15 | 39.15 | Ve      | 32.06 | 6.41 | 12.82 | 19.24 | 25.65 | 25.65 |
| 50-54 | Hø   | 48.40 | 9.68  | 19.36 | 29.04 | 38.72 | 38.72 | Hø      | 28.37 | 5.67 | 11.35 | 17.02 | 22.70 | 22.70 |
|       | Ve   | 41.46 | 8.29  | 16.58 | 24.88 | 33.17 | 33.17 | Ve      | 26.28 | 5.26 | 10.51 | 15.77 | 21.02 | 21.02 |
| 55-59 | Hø   | 45.71 | 9.14  | 18.28 | 27.43 | 36.57 | 36.57 | Hø      | 29.76 | 5.95 | 11.90 | 17.86 | 23.81 | 23.81 |
|       | Ve   | 42.16 | 8.43  | 16.86 | 25.30 | 33.73 | 33.73 | Ve      | 27.81 | 5.56 | 11.12 | 16.69 | 22.25 | 22.25 |
| 60-64 | Hø   | 40.59 | 8.12  | 16.24 | 24.35 | 32.47 | 32.47 | Hø      | 26.35 | 5.27 | 10.54 | 15.81 | 21.08 | 21.08 |
|       | Ve   | 37.25 | 7.45  | 14.90 | 22.35 | 29.80 | 29.80 | Ve      | 23.47 | 4.69 | 9.39  | 14.08 | 18.78 | 18.78 |
| 65-69 | Hø   | 40.87 | 8.17  | 16.35 | 24.52 | 32.70 | 32.70 | Hø      | 23.60 | 4.72 | 9.44  | 14.16 | 18.88 | 18.88 |
|       | Ve   | 36.57 | 7.31  | 14.63 | 21.94 | 29.26 | 29.26 | Ve      | 23.38 | 4.68 | 9.35  | 14.03 | 18.70 | 18.70 |
| 70-74 | Hø   | 37.48 | 7.50  | 14.99 | 22.49 | 29.98 | 29.98 | Hø      | 25.84 | 5.17 | 10.34 | 15.50 | 20.67 | 20.67 |
|       | Ve   | 35.49 | 7.10  | 14.20 | 21.29 | 28.39 | 28.39 | Ve      | 22.92 | 4.58 | 9.17  | 13.75 | 18.34 | 18.34 |
| 75+   | Hø   | 32.76 | 6.55  | 13.10 | 19.66 | 26.21 | 26.21 | Hø      | 19.40 | 3.88 | 7.76  | 11.64 | 15.52 | 15.52 |
|       | Ve   | 28.59 | 5.72  | 11.44 | 17.15 | 22.87 | 22.87 | Ve      | 17.64 | 3.53 | 7.06  | 10.58 | 14.11 | 14.11 |

Gilbertson, L. and Barber-Lomax, S. (1994), 'Power and Pinch Grip Strength Recorded Using the Hand-Held Jamar Dynamometer and B+L Hydraulic Pinch Gauge: British Normative Data for Adults', *British Journal of Occupational Therapy*, 57 (12), pp. 483-488.
